# Supplementary material for: Repeated neonatal isoflurane exposures in the mouse induce apoptotic degenerative changes in the brain and relatively mild long-term behavioral deficits
Source: PubMed Central journal article supplement (PMC6391407; doi:10.1038/s41598-019-39174-6), 2019-02-26
Supplement: 41598_2019_39174_MOESM1_ESM.pdf [file 41598_2019_39174_MOESM1_ESM.pdf]

## **Supplementary Information**

### **Repeated neonatal isoflurane exposures in the mouse induce apoptotic degenerative changes in the brain and relatively mild long-term behavioral deficits.**

Susan E. Maloney, Carla M. Yuede, Catherine E. Creeley, Sasha L. Williams, Jacob N. Huffman, George T. Taylor, Kevin N. Noguchi, David F. Wozniak

**Supplementary Table S1. Statistical results of behavioral testing of P3+5+7 ISO- and AIR-exposed mice.**

| VARIABLE                                                  | COMPARISON                                        | STATISTICAL TEST | OUTPUT                  | P VALUE     | NONPARAMETRIC |
|-----------------------------------------------------------|---------------------------------------------------|------------------|-------------------------|-------------|---------------|
| Body weights                                              | Age x Drug interaction (P3, P4, P6, P8, P14, P21) | two-way rmANOVA  | $F(1,32,40.96)=0.716$   | $p=.612$    | n/a           |
|                                                           | Drug (P30)                                        | two-way ANOVA    | $F(1,31)=0.007$         | $p=.935$    | normal        |
|                                                           | Drug (P45)                                        | two-way ANOVA    | $F(1,31)=0.230$         | $p=.635$    | normal        |
|                                                           | Drug (P60)                                        | two-way ANOVA    | $F(1,31)=0.669$         | $p=.420$    | normal        |
| Cued, path length<br>(across 4 blocks of trials)          | Drug                                              | two-way rmANOVA  | $F(1,31)=0.093$         | $p=.763$    | normal        |
|                                                           | Trial                                             | two-way rmANOVA  | $F(2.59,80.38)=25.454$  | $p<.000005$ | normal        |
|                                                           | Males only, Drug                                  | rmANOVA          | $F(1,18)=0.066$         | $p=.800$    | n/a           |
|                                                           | Females only, Drug                                | rmANOVA          | $F(1,13)=0.391$         | $p=.543$    | normal        |
| Cued, latency to platform<br>(across 4 blocks of trials)  | Drug                                              | two-way rmANOVA  | $F(1,31)=0.099$         | $p=.755$    | normal        |
|                                                           | Trial                                             | two-way rmANOVA  | $F(2.64,81.67)=29.064$  | $p<.000005$ | normal        |
|                                                           | Males only, Drug                                  | rmANOVA          | $F(1,18)=0.388$         | $p=.541$    | normal        |
|                                                           | Females only, Drug                                | rmANOVA          | $F(1,13)=0.612$         | $p=.448$    | normal        |
| Cued, swim speeds<br>(across 4 blocks of trials)          | Drug                                              | two-way rmANOVA  | $F(1,31)=0.006$         | $p=.939$    | normal        |
|                                                           | Trial                                             | two-way rmANOVA  | $F(1,93)=5.894$         | $p=.001$    | normal        |
|                                                           | Males only, Drug                                  | rmANOVA          | $F(1,18)=0.324$         | $p=.576$    | normal        |
|                                                           | Females only, Drug                                | rmANOVA          | $F(1,13)=0.202$         | $p=.661$    | n/a           |
| Place, path length<br>(across 5 blocks of trials)         | Drug                                              | two-way rmANOVA  | $F(1,31)=0.320$         | $p=.576$    | normal        |
|                                                           | Trial                                             | two-way rmANOVA  | $F(3.37,104.37)=12.152$ | $p<.000005$ | normal        |
|                                                           | Males only, Drug                                  | rmANOVA          | $F(1,18)=0.124$         | $p=.729$    | normal        |
|                                                           | Females only, Drug                                | rmANOVA          | $F(1,13)=0.210$         | $p=.654$    | normal        |
| Place, latency to platform<br>(across 5 blocks of trials) | Drug                                              | two-way rmANOVA  | $F(1,31)=0.108$         | $p=.744$    | normal        |
|                                                           | Trial                                             | two-way rmANOVA  | $F(3.68,114.19)=8.493$  | $p=.000009$ | normal        |
|                                                           | Males only, Drug                                  | rmANOVA          | $F(1,18)=0.167$         | $p=.687$    | normal        |
|                                                           | Females only, Drug                                | rmANOVA          | $F(1,13)=0.002$         | $p=.965$    | normal        |
| Place, swim speeds<br>(across 5 blocks of trials)         | Drug                                              | two-way rmANOVA  | $F(1,31)=0.066$         | $p=.798$    | normal        |
|                                                           | Trial                                             | two-way rmANOVA  | $F(4,124)=20.016$       | $p<.000005$ | normal        |
|                                                           | Males only, Drug                                  | rmANOVA          | $F(1,18)=0.263$         | $p=.614$    | normal        |
|                                                           | Females only, Drug                                | rmANOVA          | $F(1,13)=0.893$         | $p=.362$    | normal        |
| Probe, target quadrant<br>spatial bias                    | Drug x Quadrant interaction                       | two-way rmANOVA  | $F(1.64,50.70)=0.849$   | $p=.413$    | normal        |
|                                                           | Males only, Drug x Quadrant interaction           | rmANOVA          | $F(1.77,31.98)=1.054$   | $p=.353$    | normal        |
|                                                           | Females only, Drug x Quadrant interaction         | rmANOVA          | $F(1.57,20.36)=0.771$   | $p=.446$    | normal        |
| Percent time freezing<br>(across test minutes)            | Day 1 baseline, Drug                              | two-way rmANOVA  | $F(1,31)=2.652$         | $p=.114$    | n/a           |
|                                                           | Day 1 shock+tone pairing, Drug                    | two-way rmANOVA  | $F(1,31)=1.141$         | $p=.294$    | n/a           |
|                                                           | Day 2 contextual fear, Drug                       | two-way rmANOVA  | $F(1,31)=1.047$         | $p=.314$    | normal        |
|                                                           | Day 3 baseline, Drug                              | two-way rmANOVA  | $F(1,31)=0.064$         | $p=.802$    | n/a           |
|                                                           | Day 3 auditory cued fear, Drug                    | two-way rmANOVA  | $F(1,31)=0.732$         | $p=.399$    | normal        |

Equivalent nonparametric test for two-way rmANOVA not available (n/a) for non-normal distributions.

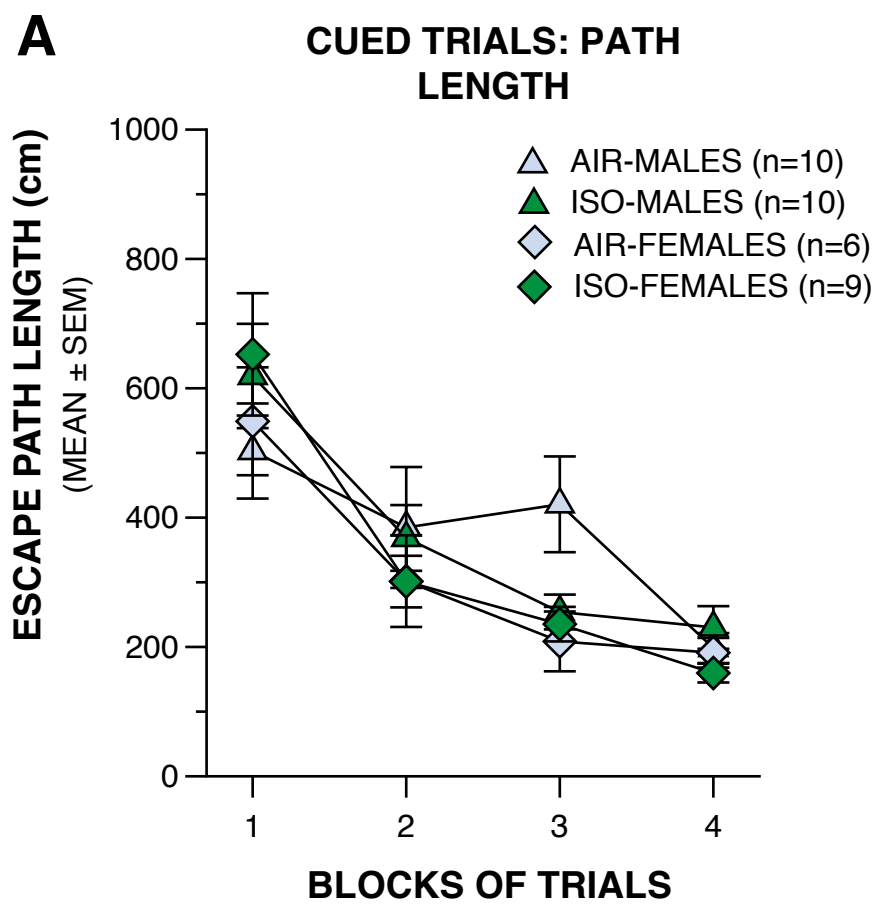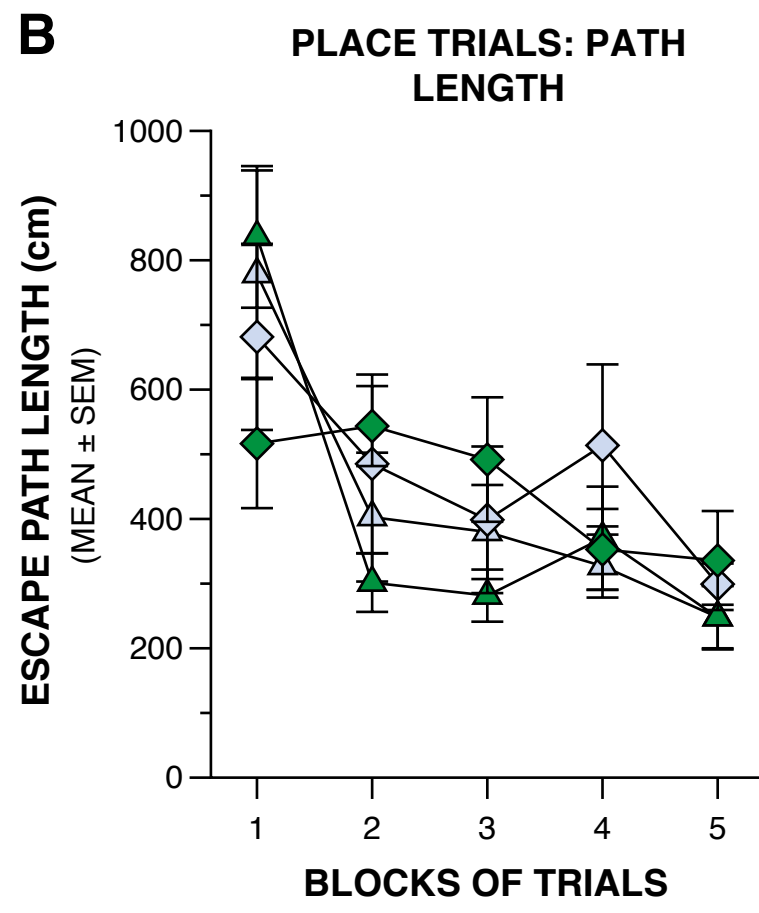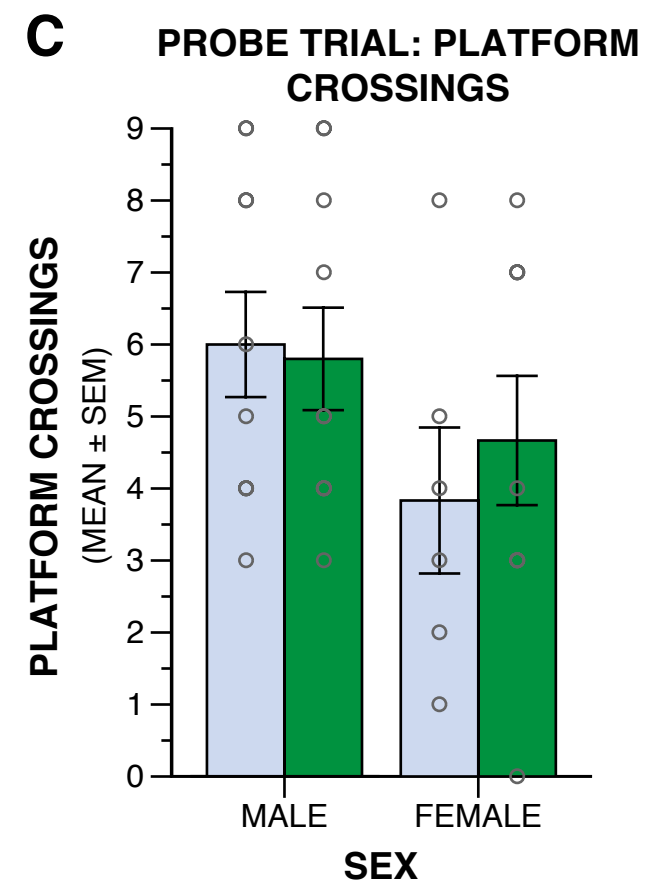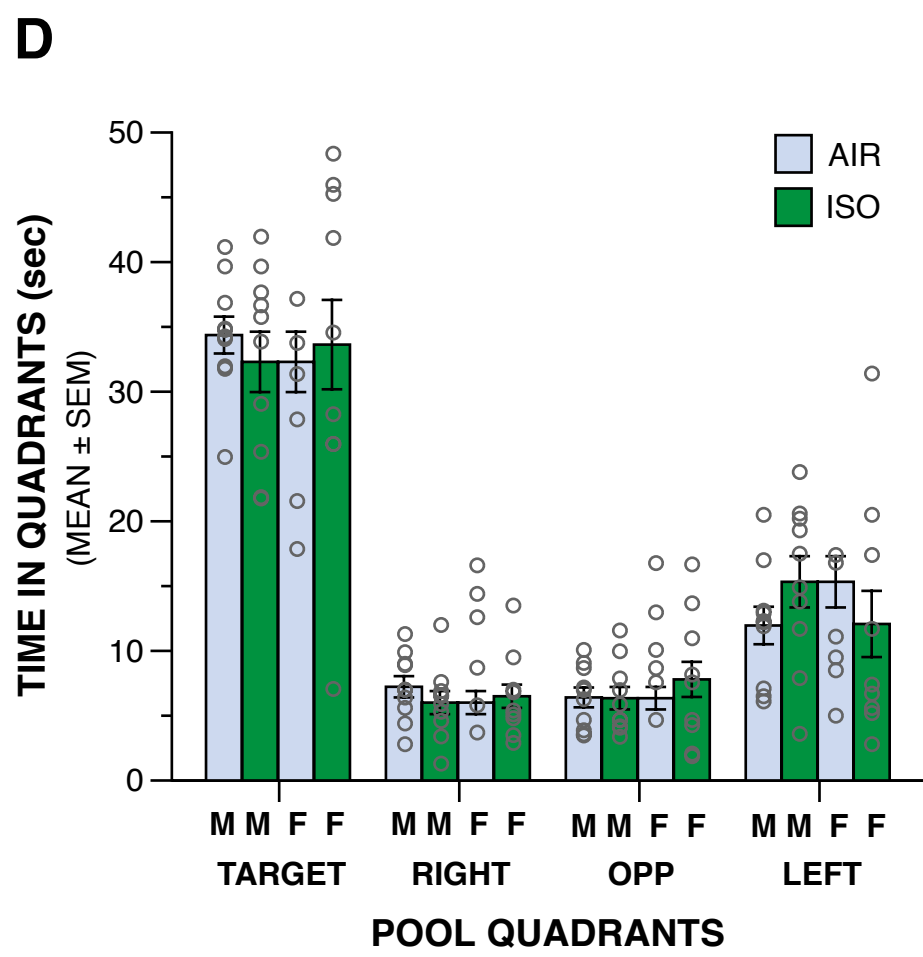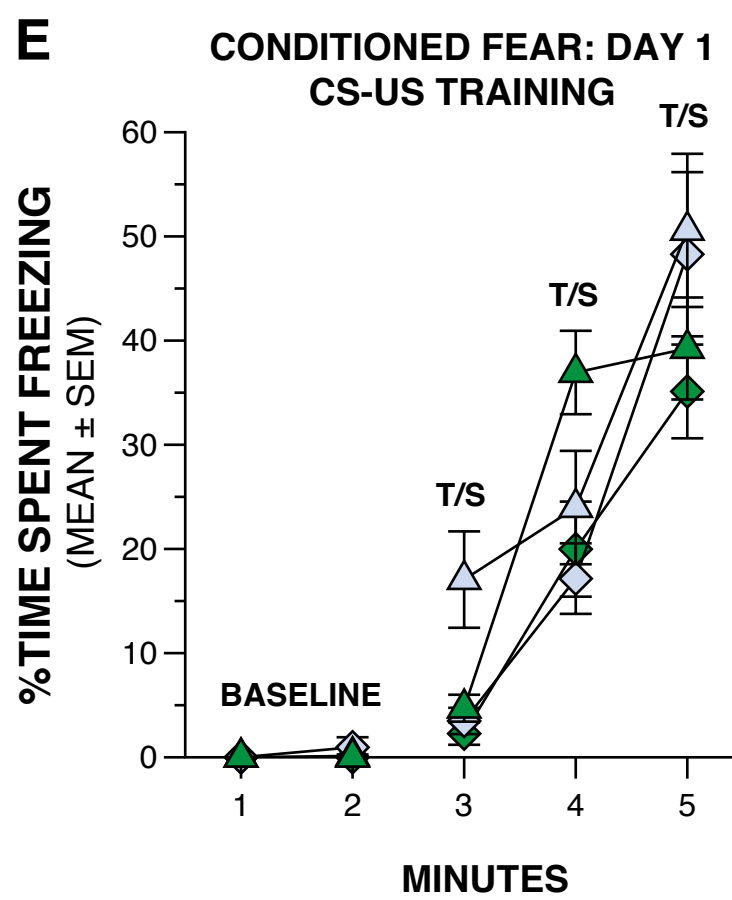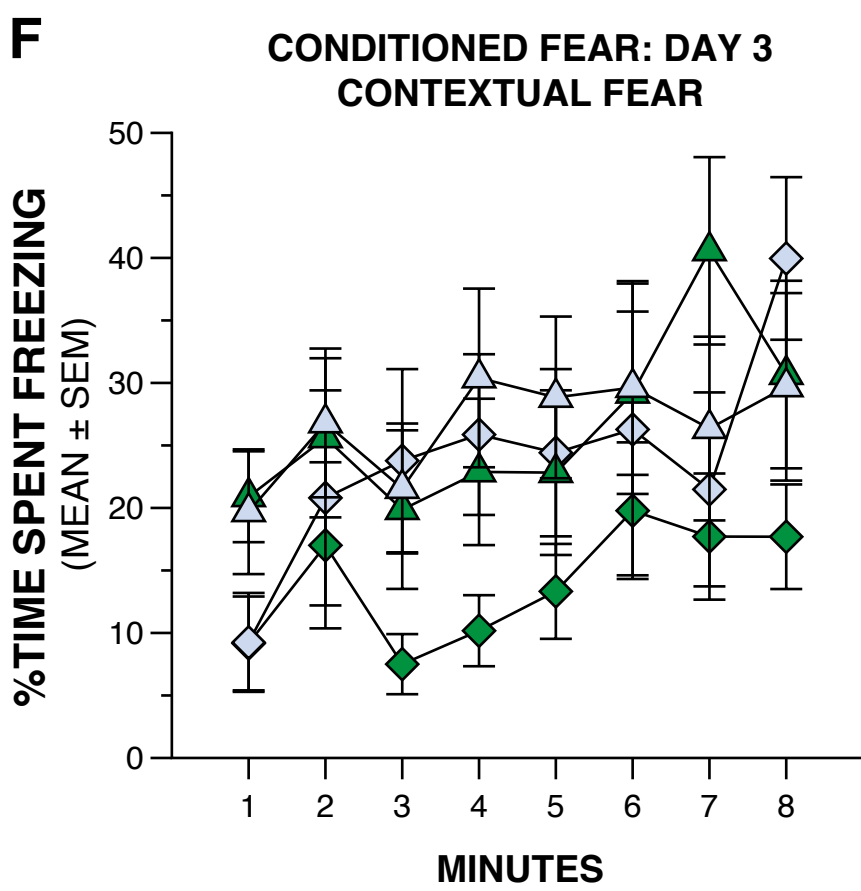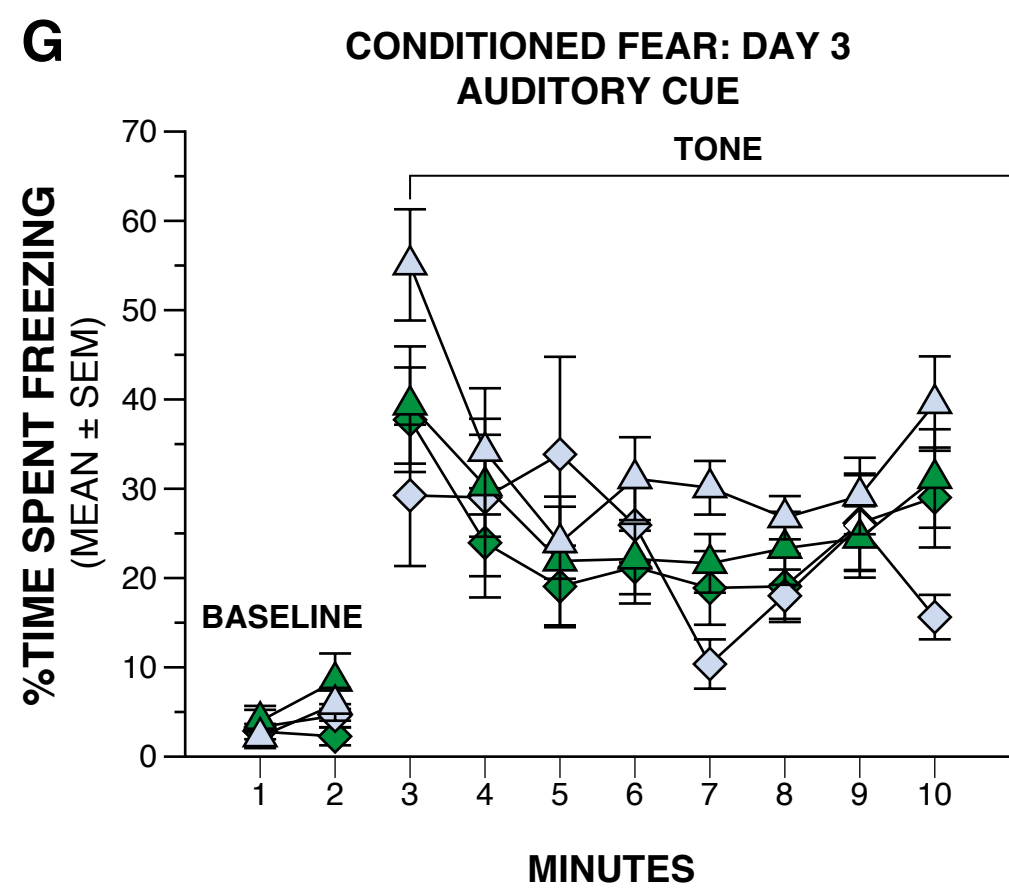

**Supplementary Figure S1. Disruptions in learning and memory performance were not observed in mice exposed to neonatal ISO multiple times.** Male and female mice were exposed to 1.5% ISO for 3h or AIR only on P3+5+7 and behaviorally characterized across multiple domains beginning during the juvenile stage and continuing into adulthood. **A-B)** ISO and AIR mice of both sexes traveled comparable path lengths to the platform during **(A)** cued and **(B)** place trials of the MWM. **C-D)** During the MWM probe trial, ISO and AIR mice of both sexes demonstrated **(C)** comparable platform location crossings and **(D)** spatial bias for the target quadrant containing the escape platform. **E-G)** ISO and AIR mice spent a comparable percent time freezing during the three days of fear conditioning: **(E)** pairing of shock + tone, **(F)** contextual fear, and **(G)** auditory cued fear. Means  $\pm$  SEM are shown. All data points represented by open gray circles.

**Supplementary Table S2. Statistical results of behavioral re-testing in later adulthood of P3+5+7 ISO- and AIR-exposed mice.**

| VARIABLE                                                           | COMPARISON             | STATISTICAL TEST   | OUTPUT           | P VALUE     | NONPARAMETRIC |
|--------------------------------------------------------------------|------------------------|--------------------|------------------|-------------|---------------|
| Total ambulations<br>(across 10-min blocks)                        | Drug x Sex x Block     | two-way rmANOVA    | $F(5,155)=2.626$ | $p=.026$    | normal        |
|                                                                    | Males only, Drug       | rmANOVA            | $F(1,18)=0.374$  | $p=.549$    | n/a           |
|                                                                    | Females only, Drug     | rmANOVA            | $F(1,13)=3.294$  | $p=.093$    | normal        |
| Time in open arm<br>(across 3 days)                                | Drug                   | two-way rmANOVA    | $F(1,31)=0.009$  | $p=.925$    | normal        |
|                                                                    | Males only, Drug       | rmANOVA            | $F(1,18)=1.771$  | $p=.200$    | normal        |
|                                                                    | Females only, Drug     | rmANOVA            | $F(1,13)=0.767$  | $p=.397$    | normal        |
| Percent time in open arm<br>(Aross 3 days)                         | Drug                   | two-way rmANOVA    | $F(1,31)=0.043$  | $p=.837$    | n/a           |
|                                                                    | Males only, Drug       | rmANOVA            | $F(1,18)=2.066$  | $p=.168$    | normal        |
|                                                                    | Females only, Drug     | rmANOVA            | $F(1,13)=0.687$  | $p=.422$    | normal        |
| Sociability,<br>investigation zone time<br>(social vs. empty)      | Drug x Zone            | two-way rmANOVA    | $F(1,31)=0.084$  | $p=.774$    | normal        |
|                                                                    | AIR, Zone              | planned comparison | $F(1,31)=56.521$ | $p<.000005$ | normal        |
|                                                                    | ISO, Zone              | planned comparison | $F(1,31)=78.950$ | $p<.000005$ | normal        |
|                                                                    | AIR males only, Zone   | planned comparison | $F(1,31)=57.151$ | $p<.000005$ | normal        |
|                                                                    | AIR females only, Zone | planned comparison | $F(1,31)=13.350$ | $p=.001$    | normal        |
|                                                                    | ISO males only, Zone   | planned comparison | $F(1,31)=45.654$ | $p<.000005$ | normal        |
|                                                                    | ISO females only, Zone | planned comparison | $F(1,31)=34.078$ | $p<.000005$ | normal        |
| Social novelty,<br>investigation zone time<br>(familiar vs. novel) | Drug x Zone            | two-way rmANOVA    | $F(1,31)=0.846$  | $p=.365$    | normal        |
|                                                                    | AIR, Zone              | planned comparison | $F(1,31)=28.285$ | $p=.00001$  | normal        |
|                                                                    | ISO, Zone              | planned comparison | $F(1,31)=12.243$ | $p=.001$    | normal        |
|                                                                    | AIR males only, Zone   | planned comparison | $F(1,31)=9.678$  | $p=.004$    | normal        |
|                                                                    | AIR females only, Zone | planned comparison | $F(1,31)=4.065$  | $p=.053$    | normal        |
|                                                                    | ISO males only, Zone   | planned comparison | $F(1,31)=18.844$ | $p=.0001$   | normal        |
|                                                                    | ISO females only, Zone | planned comparison | $F(1,31)=10.304$ | $p=.003$    | normal        |

Equivalent nonparametric test for two-way rmANOVA not available (n/a) for non-normal distributions.
